# Supplementary material for: DNA Methylation in Inflammatory Pathways Modifies the Association between BMI and Adult-Onset Non-Atopic Asthma
Source: PubMed Central journal article supplement (PMC6406386; doi:10.3390/ijerph16040600), 2019-02-19
Supplement: ijerph-16-00600-s001.pdf [file ijerph-16-00600-s001.pdf]

## Supplementary Material

# DNA Methylation in Inflammatory Pathways Modifies the Association between BMI and Adult-Onset Non-Atopic Asthma

Ayong Jeong <sup>1,2</sup>, Medea Imboden <sup>1,2</sup>, Akram Ghantous <sup>3</sup>, Alexei Novoloaca <sup>3</sup>, Anne-Elie Carsin <sup>4,5,6</sup>, Manolis Kogevinas <sup>4,5,6</sup>, Christian Schindler <sup>1,2</sup>, Gianfranco Lovison <sup>7</sup>, Zdenko Herceg <sup>3</sup>, Cyrille Cuenin <sup>3</sup>, Roel Vermeulen <sup>8</sup>, Deborah Jarvis <sup>9</sup>, André F. S. Amaral <sup>9</sup>, Florian Kronenberg <sup>10</sup>, Paolo Vineis <sup>11,12</sup> and Nicole Probst-Hensch <sup>1,2,\*</sup>

<sup>1</sup> Swiss Tropical and Public Health Institute, 4051 Basel, Switzerland; a.jeong@swisstph.ch (A.J.); medea.imboden@swisstph.ch (M.I.); christian.schindler@swisstph.ch (C.S.)

<sup>2</sup> Department of Public Health, University of Basel, 4001 Basel, Switzerland

<sup>3</sup> International Agency for Research on Cancer, 69372 Lyon, France; ghantousa@iarc.fr (A.G.); NovoloacaA@students.iarc.fr (A.N.); herceg@iarc.fr (Z.H.); CueninC@iarc.fr (C.C.)

<sup>4</sup> ISGlobal, Barcelona Institute for Global Health, 08003 Barcelona, Spain; anneelie.carsin@isglobal.org (A.-E.C.); manolis.kogevinas@isglobal.org (M.K.)

<sup>5</sup> Universitat Pompeu Fabra (UPF), 08002 Barcelona, Spain

<sup>6</sup> CIBER Epidemiología y Salud Pública (CIBERESP), 08005 Barcelona, Spain

<sup>7</sup> Department of Economics, Business and Statistics, University of Palermo, 90128 Palermo, Italy; gianfranco.lovison@unipa.it

<sup>8</sup> Environmental Epidemiology Division, Utrecht University, Institute for Risk Assessment Sciences, 3584CM Utrecht, Netherlands; R.C.H.Vermeulen@uu.nl

<sup>9</sup> Population Health and Occupational Disease, National Heart and Lung Institute, Imperial College, SW3 6LR London, UK; d.jarvis@imperial.ac.uk (D.J.); a.amaral@imperial.ac.uk (A.F.S.A.)

<sup>10</sup> Division of Genetic Epidemiology, Medical University of Innsbruck, 6020 Innsbruck, Austria; Florian.Kronenberg@i-med.ac.at

<sup>11</sup> MRC-PHE Centre for Environment and Health, School of Public Health, Imperial College London, W2 1PG London, UK; p.vineis@imperial.ac.uk

<sup>12</sup> Italian Institute for Genomic Medicine (IIGM), 10126 Turin, Italy

\* Correspondence: nicole.probst@swisstph.ch; Tel.: +41-61-284-8378

**Table S1.** Genes curated to 17 inflammatory pathways and NLRP3-IL1B-IL17 axis.

| Pathway                          | #Genes | Genes                                                                                                                                                                                                                                                                                                                                                                                                                                                                                                                                                                                                                                                                                                                                                                                                                                                                                                                                                                                                                                                                                                                                                                                                                |
|----------------------------------|--------|----------------------------------------------------------------------------------------------------------------------------------------------------------------------------------------------------------------------------------------------------------------------------------------------------------------------------------------------------------------------------------------------------------------------------------------------------------------------------------------------------------------------------------------------------------------------------------------------------------------------------------------------------------------------------------------------------------------------------------------------------------------------------------------------------------------------------------------------------------------------------------------------------------------------------------------------------------------------------------------------------------------------------------------------------------------------------------------------------------------------------------------------------------------------------------------------------------------------|
| Adhesion-extravasation-migration | 142    | PTPRU, VCAM1, CD58, CD2, MUC1, DARC, CD48, F11R, XCL1, SELP, SELL, SELE, RASSF5, CD34, MENA, ITGB1, CXCL12, VCL, ADAM8, ARHGAP1, CTNND1, SIPA1, CTTN, FUT4, MMP7, MMP10, MMP1, MMP12, BLR1, THY1, JAM3, CD9, ITGB7, ITGA5, MMP19, MYL6, SELPLG, PXN, MMP14, SPN, ITGAL, ITGAM, ITGAX, ITGAD, MLCK, MMP2, CCL22, CX3CL1, CCL17, CDH5, CKLF, CRK, ITGAE, CXCL16, MYH10, CCL2, CCL7, CCL11, CCL8, CCL13, CCL1, CCL5, CCL16, CCL15, CCL23, CCL18, CCL4, CCR7, ITGA2B, ITGB3, ITGA3, ICAM2, PECAM1, ITGB4, CD226, ICAM1, ICAM5, ICAM3, CD97, CEACAM5, CEACAM6, CEACAM3, CEACAM1, CEACAM8, PLAUR, VASP, CD33, ROCK2, ITGA6, ITGA4, ITGAV, ALS2, CCL20, SIGLEC1, MMP9, JAM2, ITGB2, MIF, MYH9, CCR4, CX3CR1, CCR8, CCBP2, CXCR6, XCR1, CCR1, CCR3, CCR2, CCR5, CCRL2, RHOA, ALCAM, CD47, CD96, RHOH, CXCL1, PPBP, CXCL5, CXCL3, CXCL2, CXCL9, CXCL10, CXCL11, CXCL13, FYB, CCL28, ITGA1, ITGA2, CXCL14, LECT2, HMMR, NT5E, VIL2, CCR6, CCL26, CCL24, PTP-PEST, CD36, CCL27, CCL19, CCL21, CD99                                                                                                                                                                                                                              |
| Apoptosis signaling              | 68     | DFFB, DFFA, CASP9, MCL1, DAP3, LMNA, FASLG, CAPN2, PARP1, CDC2, FAS, CASP7, GAS2, BAD, CAPN1, FADD, BIRC3, BIRC2, CASP12, BCL2L14, CRADD, APAF1, DIABLO, ACIN1, BCL2L2, RIPK3, BCL2L10, BCL2A1, TP53, ROCK1, BCL2, CASP14, CAPNS1, BBC3, BAX, BCL2L12, HTRA2, BCL2L11, TANK, CFLAR, CASP10, CASP8, CAPN10, BCL2L1, BCL2L13, BID, A4GALT, BIK, FAIM, TNFSF10, PTPN13, CASP6, CASP3, DAP, DAXX, BAK1, TNFRSF21, CASP8AP2, CYCS, CASP2, TNFRSF10B, TNFRSF10C, TNFRSF10D, TNFRSF10A, RIPK2, DAPK1, SPTAN1, ENDOG                                                                                                                                                                                                                                                                                                                                                                                                                                                                                                                                                                                                                                                                                                         |
| Calcium signaling                | 14     | CAMK1D, PPP3CB, NFATC4, AKAP5, NFATC3, NFAT5, NFATC1, PPP3R1, NFATC2, CABIN1, PPP3CA, CAMK4, PPP3CC, PPP3R2                                                                                                                                                                                                                                                                                                                                                                                                                                                                                                                                                                                                                                                                                                                                                                                                                                                                                                                                                                                                                                                                                                          |
| Complement cascade               | 40     | MASP2, C1QA, C1QC, C1QB, C8A, C8B, SERPINC1, CFH, C4BPB, C4BPA, CD55, CR2, CR1, CD46, MBL2, CD59, SERPING1, C1S, C1R, C3AR1, SERPINA1, SERPINA5, SERPINF2, CFD, C3, CPAMD8, C5AR1, SERPIND1, MASP1, CFI, C9, C7, C6, C2, CFB, C4B, SERPINE1, C5, C8G, PFC                                                                                                                                                                                                                                                                                                                                                                                                                                                                                                                                                                                                                                                                                                                                                                                                                                                                                                                                                            |
| Cytokine signaling               | 172    | IL22RA1, TXLNA, CSF3R, JAK1, IL23R, IL12RB2, CSF1, PIAS3, S100A9, S100A12, S100A8, ILF2, IL6R, CRP, IL10, IL19, IL20, IL24, IRF6, TGFB2, IL15RA, IL2RA, GATA3, BMPR1A, IRF7, CASP1, IL18, IL10RA, STAT2, STAT6, IFNG, IL26, IL22, SOCS2, IL31, IL17D, HMGB1, IL25, ISGF3G, BMP4, SOCS4, TGFB3, PIAS1, IL16, IL32, SOCS1, IL4R, IL21R, IRF8, IL17C, CSF3, STAT5B, STAT5A, STAT3, TBX21, ACE, SOCS3, TGIF, PTPN2, PIAS2, SOCS6, PIAS4, EBI3, C19ORF10, TYK2, IL27RA, JAK3, IL12RB1, IL28B, IL28A, IL29, TGFB1, IRF3, IL11, ADAM17, SOCS5, TGFA, IL1R2, IL1R1, IL1RL2, IL1RL1, IL18R1, IL18RAP, IL1A, IL1B, IL1F7, IL1F9, IL1F6, IL1F8, IL1F5, IL1F10, IL1RN, NMI, STAT1, STAT4, BMPR2, IL8RB, IL8RA, BMP2, TGIF2, CEBPB, PTPN1, IFNAR2, IL10RB, IFNAR1, IFNGR2, IL17RA, LIF, OSM, CSF2RB, IL2RB, PDGFB, IL5RA, TGFB2, CISH, IL17RB, IL12A, THPO, IL1RAP, PDGFRA, IL8, BMPR1B, IL2, IL21, IL15, IRF2, IL7R, LIFR, OSMR, IL31RA, IL6ST, IL3, CSF2, IRF1, IL5, IL13, IL4, IL9, IL17B, CSF1R, PDGFRB, IL12B, IRF4, AGER, VEGF, IL17A, IL17F, IFNGR1, IL6, IRF5, IL7, JAK2, C9ORF26, IFNB1, IFNW1, IFNA21, IFNA4, IFNA10, IFNA5, IFNA6, IFNA2, IFNA8, IFNA1, IFNK, NFIL3, TGFB1, ENG, IL3RA, CRSP2, IL2RG, IL13RA2, IL13RA1 |

**Table S1 (cont.)** Genes curated to 17 inflammatory pathways and NLRP3-IL1B-IL17 axis.

| Pathway                              | #Genes | Genes                                                                                                                                                                                                                                                                                                                                                                                                                                                                                                                                                                                                                                                                                                                                                                                                                                                                       |
|--------------------------------------|--------|-----------------------------------------------------------------------------------------------------------------------------------------------------------------------------------------------------------------------------------------------------------------------------------------------------------------------------------------------------------------------------------------------------------------------------------------------------------------------------------------------------------------------------------------------------------------------------------------------------------------------------------------------------------------------------------------------------------------------------------------------------------------------------------------------------------------------------------------------------------------------------|
| Eicosanoid signaling                 | 39     | PLA2G2A, PLA2G2D, PTGER3, PTGFR, MGST3, PTGS2, AKR1C3, ALOX5, GPR44, PTGES3, LTA4H, ALOX5AP, CYSLTR2, PTGDR, PTGER2, DPEP3, DPEP2, DPEP1, ALOX15, ALOX12, ALOX15B, ALOX12B, TBXA2R, PTGER1, PTGIR, FPRL1, FPRL2, PTGIS, GGT1, PGDS, MGST2, PTGER4, LTC4S, TBXAS1, PTGS1, PTGES2, PTGES, PTGDS, CYSLTR1                                                                                                                                                                                                                                                                                                                                                                                                                                                                                                                                                                      |
| Glucocorticoid/PPAR signaling        | 21     | GMEB1, FAF1, FKBP4, NR4A1, PPARBP, NCOA1, NR4A2, SDPR, HSPD1, GMEB2, NRIP1, PPARA, KPNA1, PPARGC1A, NR2F1, NR3C1, FOXO3A, SGK, CITED2, GLCCI1, NCOA2                                                                                                                                                                                                                                                                                                                                                                                                                                                                                                                                                                                                                                                                                                                        |
| G-Protein coupled receptor signaling | 42     | PDE4B, PRKACB, ADORA3, RGS1, ADORA1, CREM, ADRA2A, PDE3B, PLCB3, ADRBK1, PDE2A, PDE3A, ADCY6, PDE1B, ADCY4, PLCB2, CREBBP, ADORA2B, PRKAR1A, PDE4A, PRKACA, PDE4C, PDE1A, CREB1, PLCB1, PLCB4, ADORA2A, HRH1, PRKAR2A, ADCY5, GRK4, ADRA2C, ADCY2, PDE4D, ADRB2, HRH2, SYNGAP1, PDE1C, ADCY1, PRKAR2B, PTK2B, PRKACG                                                                                                                                                                                                                                                                                                                                                                                                                                                                                                                                                        |
| Innate pathogen detection            | 50     | PGLYRP3, PGLYRP4, CIAS1, NALP6, TOLLIP, CASP5, COP1, ICEBERG, TIRAP, IRAK4, IRAK3, HSP90B1, OAS1, OAS2, PYCARD, CARD15, NALP1, SARM1, TICAM1, SITPEC, PGLYRP2, PGLYRP1, CARD8, NALP12, NALP2, CARD12, IFIH1, PRKRA, KIAA1271, LBP, IRAK2, MYD88, TLR9, TLR10, TLR1, TLR6, TLR2, TLR3, TLR5, CARD6, CD180, TICAM2, CD14, CARD4, LY96, DDX58, TLR4, TLR7, TLR8, IRAK1                                                                                                                                                                                                                                                                                                                                                                                                                                                                                                         |
| Leukocyte signaling                  | 121    | CD52, PTAFR, LCK, CD53, PTPN22, IGSF3, IGSF2, VTCN1, FCGR1C, FCER1A, SLAMF9, SLAMF6, SLAMF1, SLAMF7, FCER1G, FCGR2A, FCGR2B, SH2D1B, CD3Z, PTPRC, PTPN7, PIGR, TCF8, BLNK, PIK3AP1, CD44, RAG1, PTPRJ, MS4A2, MS4A1, CD5, SCGB1A1, SLC3A2, TCIRG1, CD3E, CBL, CD4, LRRC23, KITLG, FLT3, EDNRB, IGHA1, CSK, LAT, SLC7A5, SCARF1, CD68, CD79B, GRB2, SECTM1, VAV1, FCER2, CD22, CD79A, CD37, FLT3LG, SIGLEC10, SIGLEC5, LILRB3, LILRA6, LILRB2, LILRA3, LILRA5, LILRA4, LILRA2, LILRA1, LILRB4, LILRP2, FCAR, TACR1, CD8A, CD8B1, MAL, ZAP70, MARCO, DPP4, CD28, CTLA4, ICOS, SIRPB1, SIRPG, PTPNS1, CST7, SLA2, CD40, ICOSLG, SCARF2, VPREB1, IGLL1, GRAP2, MST1R, CD80, CD86, SH3BP2, CD38, TXK, TEC, DAPP1, EDNRA, TCF7, ITK, LCP2, SCGB3A1, TREM2, TREM1, TFEB, FYN, TRGV9, PILRB, PBEF1, MSR1, PAG1, PDCD1LG2, PAX5, SHB, SEMA4D, SYK, ABL1, FOXP3, BTK, CD40LG          |
| MAPK signaling                       | 118    | PRKCZ, RAP1GAP, RPS6KA1, MAP3K6, HDAC1, MKNK1, JUN, RAP1A, NRAS, SHC1, MEF2D, IFI16, PLA2G4A, MAPKAPK2, ATF3, DUSP10, PRKCQ, MAPK8, HRAS, INS, MADD, RPS6KA4, FOSL1, PPP1CA, PAK1, PPP2R1B, HSPB2, ETS1, KRAS, RAPGEF3, ATF1, DDIT3, DUSP6, PPP1CC, MAPKAPK5, SOS2, PPM1A, MAX, FOS, RPS6KA5, RASGRP1, TLN2, MAP2K1, MEF2A, EEF2K, PRKCB1, MAPK3, BCAR1, MAP2K4, MAP2K3, KSR1, PRKCA, MAP2K6, MAP2K2, JUND, MEF2B, MAP4K1, PPP2R1A, YWHAQ, MYCN, PPP1CB, SOS1, PRKCE, DUSP2, ATF2, PPP1R7, SRC, PLCG1, YWHAB, ETS2, HMGN1, MAPK1, YWHAH, RAC2, MAP3K7IP1, ATF4, EP300, MAPK12, MAPK11, PPARG, RAF1, KCNH8, MAPKAPK3, PRKCD, PPP2R3A, EGF, MAP3K1, RASA1, MEF2C, HINT1, PPP2CA, PPP2R2B, DUSP1, MAPK9, MAPK14, MAPK13, MAP3K7, HDAC2, PTPRK, MAP3K5, MAP3K7IP2, ESR1, RAC1, EGFR, HSPB1, YWHAG, BRAF, DUSP4, PPP2CB, LYN, YWHAZ, MYC, PTK2, TLN1, RAPGEF1, ARAF, ELK1, DUSP9 |

**Table S1 (cont.)** Genes curated to 17 inflammatory pathways and NLRP3-IL1B-IL17 axis.

| Pathway                            | #Genes | Genes                                                                                                                                                                                                                                                                                                                               |
|------------------------------------|--------|-------------------------------------------------------------------------------------------------------------------------------------------------------------------------------------------------------------------------------------------------------------------------------------------------------------------------------------|
| Natural killer cell signaling      | 31     | CD160, CD244, FCGR3A, NCAM1, B3GAT1, PTPN6, KLRB1, KLRD1, KLRK1, KLRC4, KLRC2, KLRC1, PTPN11, CD300A, TYROBP, SIGLEC7, LAIR1, LILRB1, KIR3DL3, KIR2DS4, KIR3DL2, NCR1, HLA-G, HLA-E, MICA, MICB, NCR3, NCR2, RAET1E, ULBP3, SH2D1A                                                                                                  |
| NF-κB signaling                    | 33     | BCL10, CHUK, BTRC, NFKB2, RELA, NFRKB, TBK1, UBE2N, NFKBIA, MEFV, CSNK2A2, MAP3K14, MAP3K3, CARD14, MALT1, MAP2K7, NFKBIB, BCL3, RELB, EIF2AK2, REL, CSNK2A1, UBE2V1, CARD10, BCL6, NFKB1, RIPK1, CSNK2B, NFKBIE, CARD11, IKKBK, CARD9, IKBK                                                                                        |
| Phagocytosis-Ag presentation       | 39     | CTSS, CD1D, CD1A, CD1C, CD1B, CD1E, PSMA1, LAG3, RFX4, PSMB5, PSME1, PSME2, CIITA, CD209, RFX1, IFI30, RFXANK, LILRB5, CD207, XBP1, CD74, PRSS16, HLA-A, HLA-C, HLA-B, HLA-DRA, HLA-DQA1, HLA-DQA2, HLA-DQB2, TAP2, TAP1, PSMB9, HLA-DMB, HLA-DMA, HLA-DOA, HLA-DPA1, HLA-DPB1, TAPBP, NFX1                                         |
| PI3K/AKT signaling                 | 37     | PIK3CD, FRAP1, PIK3R3, THEM4, AKT3, MAP3K8, PTEN, ILK, RPS6KB2, CCND1, INPPL1, CDKN1B, MDM2, FOXO1A, HSP90AA1, AKT1, TSC2, PDPK1, PIK3R5, MYH4, RPS6KB1, CDC37, PIK3R2, AKT2, LIMS1, INPP5D, CTNNB1, PIK3CB, PIK3CA, EIF4E, GAB1, PIK3R1, CDKN1A, HSP90AB1, NOS3, RHEB, TSC1                                                        |
| ROS/glutathione/cytotoxic granules | 22     | PRDX1, NCF2, PRF1, CAT, PRG2, CMA1, GZMH, GZMB, GPX2, ANPEP, NOS2A, GZMM, PRTN3, ELA2, PRDX2, BPI, SOD1, GZMA, GPX3, SOD2, PRDX4, CYBB                                                                                                                                                                                              |
| TNF superfamily signaling          | 38     | TNFRSF4, TNFRSF14, TNFRSF25, TNFRSF9, TNFRSF1B, TNFSF18, TNFSF4, TRAF5, TRAF6, TNFRSF1A, LTBR, TNFRSF7, TNFRSF19, TNFSF11, TNFSF13B, TRAF3, TNFRSF12A, TNFRSF17, TRADD, TNFSF12, TNFRSF13B, TNFRSF11A, TNFSF9, TNFSF7, TNFSF14, TNFAIP6, TNFRSF13C, PTX3, TNIP1, TTRAP, LTA, TNF, TNFAIP3, TNFRSF11B, TNFSF15, TNFSF8, TRAF1, TRAF2 |
| NLRP3-IL1B-IL17 axis               | 11     | NLRP3, PYCARD, CASP1, IL1B, IL1R1, RORC, CCR6, ATXN1, THY1, CD44, IL17A                                                                                                                                                                                                                                                             |

Table S2 Agnostic pathway enrichment results of the DMRs identified from the EWAS of effect modification of BMI on adult-onset asthma.

| Pathway                                                 | P-value  | Ratio <sup>a</sup> | Genes <sup>b</sup>                                                                                                                                                                                                         |
|---------------------------------------------------------|----------|--------------------|----------------------------------------------------------------------------------------------------------------------------------------------------------------------------------------------------------------------------|
| Protein Ubiquitination Pathway                          | 0.000076 | 0.11               | USP35, PSMA7, UBR2, HSPA1A/HSPA1B, CDC23, UBE2W, SKP1, UBE2O, HSPA1L, HSPA4, USP7, UBE2B, STUB1, HSPE1, UCHL5, DNAJC30, BIRC3, UBE2Q1, UBE2M, USP19, DNAJC1, HSPD1, UBE3A, UBE2G2, CBL, HSCB, PSMA5, DNAJC18, PSMD1, HSPB1 |
| ATM Signaling                                           | 0.00019  | 0.15               | MAP2K4, PPP2R2A, TRIM28, MAPK9, TDP1, KAT5, PPM1D, USP7, PPP2R1A, BRAT1, RAD17, H2AFX, SMC1B, PPP2R5C, CHEK2                                                                                                               |
| Lysine Degradation V                                    | 0.0014   | 0.60               | AASDHPPT, PIPOX, ALDH7A1                                                                                                                                                                                                   |
| Huntington's Disease Signaling                          | 0.0018   | 0.10               | MAP2K4, SGK1, PACSIN1, HSPA1A/HSPA1B, HDAC10, HSPA1L, PRKCZ, HSPA4, CDK5, NTRK1, HDAC7, NCOR1, GNB1L, BET1L, NAPB, MAP2K7, HDAC1, APAF1, MAPK9, HIP1, ATP5F1C, CAPNS1, TAF4, IRS1, NCOR2                                   |
| Selenocysteine Biosynthesis II (Archaea and Eukaryotes) | 0.0026   | 0.50               | SEPHS1, SARS2, SEPSECS                                                                                                                                                                                                     |
| Aldosterone Signaling in Epithelial Cells               | 0.0035   | 0.11               | SGK1, HSPA1A/HSPA1B, PLCG1, DNAJC1, HSPD1, SLC9A1, PRKCZ, HSPA1L, HSPA4, PIP5K1A, DUSP1, HSCB, IRS1, HSPE1, DNAJC18, DNAJC30, PI4KA, HSPB1                                                                                 |
| Oleate Biosynthesis II (Animals)                        | 0.0038   | 0.31               | SCD, UFSP2, FADS2, FADS1                                                                                                                                                                                                   |
| Mitochondrial Dysfunction                               | 0.0043   | 0.11               | MAP2K4, NDUFV1, COX4I2, NDUFS7, ACO2, MAPK9, ATP5MG, NDUFB1, NDUFA13, UQCRB, VPS9D1, ATP5F1C, APH1A, NDUFA6, NDUFS6, ATP5MF, GPX4, TXNRD2                                                                                  |
| HIPPO signaling                                         | 0.0062   | 0.13               | YWHAQ, PPP2R1A, YWHAH, PPP2R2A, PPP1R7, SMAD3, NF2, PPP1R14A, PPP2R5C, SKP1, PRKCZ                                                                                                                                         |
| Estrogen Receptor Signaling                             | 0.0079   | 0.11               | TAF9, MED23, GTF2F2, TAF5L, ERCC2, GTF2A1, TAF4, MED15, ERCC3, MED21, SPEN, TAF3, NCOR1, NCOR2                                                                                                                             |
| Thiosulfate Disproportionation III (Rhodanese)          | 0.0081   | 0.67               | MPST, TST                                                                                                                                                                                                                  |
| Cell Cycle: G1/S Checkpoint Regulation                  | 0.0085   | 0.13               | MYC, E2F4, MAX, TGFB1, SMAD3, HDAC7, HDAC1, HDAC10, SKP1                                                                                                                                                                   |
| Cell Cycle Control of Chromosomal Replication           | 0.0089   | 0.14               | MCM5, CDK13, CDK5, CDK11B, ORC6, DNA2, POLA2, CHEK2                                                                                                                                                                        |
| IL-1 Signaling                                          | 0.0093   | 0.12               | ECSIT, MAP2K4, ADCY9, MAP2K7, TOLLIP, GNAS, GNA12, MAP3K7, MAPK9, GNB1L, ADCY7                                                                                                                                             |
| Phosphatidylglycerol Biosynthesis II (Non-plastidic)    | 0.011    | 0.19               | AGPAT5, AGPAT1, MBOAT1, PGS1, MBOAT7                                                                                                                                                                                       |
| Myc Mediated Apoptosis Signaling                        | 0.011    | 0.13               | FADD, MAP2K4, MYC, YWHAQ, YWHAH, IRS1, APAF1, MAPK9, PRKCZ                                                                                                                                                                 |

<sup>a</sup> Ratio of the number of genes in the DMR to the number of genes in the pathway. <sup>b</sup> Genes overlapping between the DMR and the pathway.

**Table S2 (cont.)** Agnostic pathway enrichment results of the DMRs identified from the EWAS of effect modification of BMI on adult-onset asthma.

| Pathway                                                               | P-value | Ratio <sup>a</sup> | Genes <sup>b</sup>                                                                                                             |
|-----------------------------------------------------------------------|---------|--------------------|--------------------------------------------------------------------------------------------------------------------------------|
| Adipogenesis pathway                                                  | 0.012   | 0.10               | SAP18, LEP, SMAD3, HDAC1, HDAC10, ERCC2, CDK5, TGFB1, ERCC3, HDAC7, CLOCK, FGFR1, TBL1XR1, FZD7                                |
| D-myo-inositol (1,4,5)-Trisphosphate Biosynthesis                     | 0.013   | 0.19               | PIP5K1A, PI4K2A, PLCG1, PI4K2B, PI4KA                                                                                          |
| Oxidative Phosphorylation                                             | 0.013   | 0.11               | VPS9D1, ATP5F1C, NDUFV1, COX4I2, NDUFS7, NDUFA6, NDUFS6, ATP5MF, ATP5MG, NDUFB1, NDUFA13, UQCRB                                |
| PPAR $\alpha$ /RXR $\alpha$ Activation                                | 0.015   | 0.094              | MAP2K4, MAP2K7, MED23, GNAS, SMAD3, PLCG1, AIP, ADCY9, TGFB1, IRS1, MAP3K7, CLOCK, NCOR1, SLC27A1, NCOR2, ADCY7, ACVR2A        |
| CDK5 Signaling                                                        | 0.015   | 0.11               | ADCY9, PPP2R1A, GNAS, CDK5, PPP2R2A, PPP1R7, EGR1, MAPK9, PPP1R14A, PPP2R5C, ADCY7                                             |
| Spermine and Spermidine Degradation I                                 | 0.016   | 0.50               | PAOX, SAT2                                                                                                                     |
| Assembly of RNA Polymerase II Complex                                 | 0.016   | 0.14               | TAF9, TAF4, ERCC3, TAF5L, TAF3, GTF2A1, ERCC2                                                                                  |
| Cell Cycle: G2/M DNA Damage Checkpoint Regulation                     | 0.016   | 0.14               | YWHAQ, YWHAH, BORA, SKP1, PRKCZ, CHEK2, PPM1D                                                                                  |
| tRNA Charging                                                         | 0.016   | 0.15               | CARS2, HARS, EARS2, HARS2, SARS2, QARS                                                                                         |
| HGF Signaling                                                         | 0.019   | 0.10               | MAP2K4, ELF2, PXN, MAP2K7, IRS1, MAP3K7, MAPK9, PLCG1, MAP3K8, STAT3, ELK3, PRKCZ                                              |
| Pyridoxal 5'-phosphate Salvage Pathway                                | 0.021   | 0.12               | MAP2K4, PNPO, CDK5, SGK1, MAPK9, MAP3K8, HIPK1, ACVR2A                                                                         |
| Mitotic Roles of Polo-Like Kinase                                     | 0.023   | 0.12               | PLK4, PPP2R1A, PPP2R2A, TGFB1, FBXO5, CDC23, PPP2R5C, CHEK2                                                                    |
| ERK5 Signaling                                                        | 0.023   | 0.12               | MYC, YWHAQ, YWHAH, SGK1, GNA12, NTRK1, MAP3K8, PRKCZ                                                                           |
| Lysine Degradation II                                                 | 0.025   | 0.40               | AASDHPPT, ALDH7A1                                                                                                              |
| Unfolded protein response                                             | 0.026   | 0.13               | HSPA4, MAP2K7, SREBF2, HSPA1A/HSPA1B, CANX, NFE2L2, HSPA1L                                                                     |
| Cyclins and Cell Cycle Regulation                                     | 0.028   | 0.11               | PPP2R1A, E2F4, PPP2R2A, TGFB1, HDAC7, HDAC1, HDAC10, PPP2R5C, SKP1                                                             |
| NRF2-mediated Oxidative Stress Response                               | 0.028   | 0.088              | MAP2K4, MAP2K7, MAPK9, DNAJC1, MAFK, PRKCZ, TXNRD1, BACH1, FTL, KEAP1, IRS1, STIP1, MAP3K7, DNAJC18, GSTO2, FKBP5, NFE2L2      |
| Production of Nitric Oxide and Reactive Oxygen Species in Macrophages | 0.030   | 0.088              | MAP2K4, MAP2K7, APOB, PPP2R2A, MAPK9, PLCG1, PPP1R14A, SPI1, PRKCZ, PON1, RHOV, PPP2R1A, PPP1R7, IRS1, MAP3K7, PPP2R5C, MAP3K8 |
| CXCR4 Signaling                                                       | 0.030   | 0.091              | MAP2K4, PXN, GNAS, MYL2, GNA12, EGR1, MAPK9, PRKCZ, ADCY9, ELMO3, RHOV, IRS1, GNB1L, ELMO1, ADCY7                              |

<sup>a</sup> Ratio of the number of genes in the DMR to the number of genes in the pathway

<sup>b</sup> Genes overlapping between the DMR and the pathway.

**Table S2 (cont.)** Agnostic pathway enrichment results of the DMRs identified from the EWAS of effect modification of BMI on adult-onset asthma.

| Pathway                                                    | P-value | Ratio <sup>a</sup> | Genes <sup>b</sup>                                                                                                                                                                                          |
|------------------------------------------------------------|---------|--------------------|-------------------------------------------------------------------------------------------------------------------------------------------------------------------------------------------------------------|
| Molecular Mechanisms of Cancer                             | 0.030   | 0.076              | MAP2K4, SMAD3, CTNNA1, PRKCZ, MYC, SYNGAP1, CDK5, TGFB1, MAP3K7, BIRC3, CHEK2, CDK13, E2F4, GNAS, GNA12, BMP8B, APAF1, MAPK9, ARHGEF17, FADD, ADCY9, RHOV, CBL, MAX, CDK11B, APH1A, IRS1, ADCY7, WNT1, FZD7 |
| Role of CHK Proteins in Cell Cycle Checkpoint Control      | 0.030   | 0.12               | PPP2R1A, E2F4, PPP2R2A, RAD17, PPP2R5C, RFC5, CHEK2                                                                                                                                                         |
| Salvage Pathways of Pyrimidine Ribonucleotides             | 0.032   | 0.10               | MAP2K4, CDK5, SGK1, MAPK9, AK4, UCK1, CMPK1, MAP3K8, HIPK1, ACVR2A                                                                                                                                          |
| STAT3 Pathway                                              | 0.032   | 0.10               | MAP2K4, MYC, SOCS1, TGFB1, NTRK1, MAPK9, FGFR1, IL27RA, STAT3, NDUFA13                                                                                                                                      |
| Telomerase Signaling                                       | 0.033   | 0.099              | MYC, ELF2, PPP2R1A, PPP2R2A, IRS1, HDAC7, HDAC1, TERT, HDAC10, PPP2R5C, ELK3                                                                                                                                |
| CDP-diacylglycerol Biosynthesis I                          | 0.035   | 0.17               | AGPAT5, AGPAT1, MBOAT1, MBOAT7                                                                                                                                                                              |
| ERK/MAPK Signaling                                         | 0.037   | 0.085              | PXN, YWHAH, PPP2R2A, SRF, PLCG1, PPP1R14A, STAT3, YWHAQ, MYC, PPP2R1A, ELF2, DUSP1, PPP1R7, IRS1, PPP2R5C, ELK3, HSPB1                                                                                      |
| Glucocorticoid Receptor Signaling                          | 0.038   | 0.077              | CD247, MAP2K4, YWHAH, GTF2F2, SGK1, SMAD3, HSPA1A/HSPA1B, GTF2A1, HSPA1L, HSPA4, TGFB1, MAP3K7, TAF3, NCOR1, FKBP5, TAF9, MAP2K7, TAF5L, MAPK9, STAT3, ERCC2, TAF4, DUSP1, IRS1, ERCC3, NCOR2               |
| TGF- $\beta$ Signaling                                     | 0.041   | 0.10               | MAP2K4, TGFB1, RNF111, SMAD3, HDAC1, SKI, MAP3K7, MAPK9, ACVR2A                                                                                                                                             |
| Role of JAK family kinases in IL-6-type Cytokine Signaling | 0.041   | 0.16               | MAP2K4, SOCS1, MAPK9, STAT3                                                                                                                                                                                 |
| Induction of Apoptosis by HIV1                             | 0.042   | 0.11               | FADD, MAP2K4, MAP2K7, APAF1, MAPK9, SLC25A3, BIRC3                                                                                                                                                          |
| Breast Cancer Regulation by Stathmin1                      | 0.046   | 0.083              | E2F4, GNAS, CAMK4, PPP2R2A, PPP1R14A, ARHGEF17, TUBB, PRKCZ, ADCY9, PPP2R1A, PPP1R7, IRS1, UHMK1, TUBA1C, PPP2R5C, GNB1L, ADCY7                                                                             |
| RAR Activation                                             | 0.046   | 0.084              | MAP2K4, SMAD3, MAPK9, ERCC2, PRKCZ, PTEN, ADCY9, TAF4, TGFB1, DUSP1, ERCC3, NCOR1, NCOR2, CSNK2B, CRABP2, ADCY7                                                                                             |
| Glycolysis I                                               | 0.047   | 0.15               | ENO1, PGAM1, PKM, ALDOA                                                                                                                                                                                     |
| PDGF Signaling                                             | 0.049   | 0.10               | MAP2K4, MYC, PDGFA, IRS1, SPHK2, SRF, PLCG1, CSNK2B, STAT3                                                                                                                                                  |
| Thioredoxin Pathway                                        | 0.049   | 0.29               | TXNRD2, TXNRD1                                                                                                                                                                                              |

<sup>a</sup> Ratio of the number of genes in the DMR to the number of genes in the pathway

<sup>b</sup> Genes overlapping between the DMR and the pathway.

**Table S3.** Sex difference in BMI effect on adult-onset asthma.

|                                      | #Cases | #Controls | Coefficient for BMI<br>[95% CI] | Coefficient for BMI:<br>Female [95% CI] |
|--------------------------------------|--------|-----------|---------------------------------|-----------------------------------------|
| All participants <sup>a</sup>        | 61     | 146       | 0.44 [0.09, 0.79]               | -                                       |
| Stratification analysis <sup>b</sup> |        |           |                                 |                                         |
| Female                               | 43     | 82        | 0.39 [-0.05, 0.83]              | -                                       |
| Male                                 | 18     | 64        | 0.51 [-0.13, 1.15]              | -                                       |
| Interaction analysis <sup>c</sup>    | 61     | 146       | 0.70 [0.06, 1.35]               | -0.37 [-1.13, 0.38]                     |

All participants are non-smoking for at least 10 years and non-atopic

<sup>a</sup> Logistic regression of adult-onset asthma on BMI adjusted for sex, age, education level, study area, and pack-years of cigarettes smoked in life

<sup>b</sup> Logistic regression of adult-onset asthma on BMI adjusted for age, education level, study area, and pack-years of cigarettes smoked in life, stratified by sex

<sup>c</sup> Logistic regression of adult-onset asthma on BMI, sex, and the interaction between BMI and sex, after adjustment for age, education level, study area, and pack-years of cigarettes smoked in life.

### EWAS of effect modification of BMI on adult-onset asthma

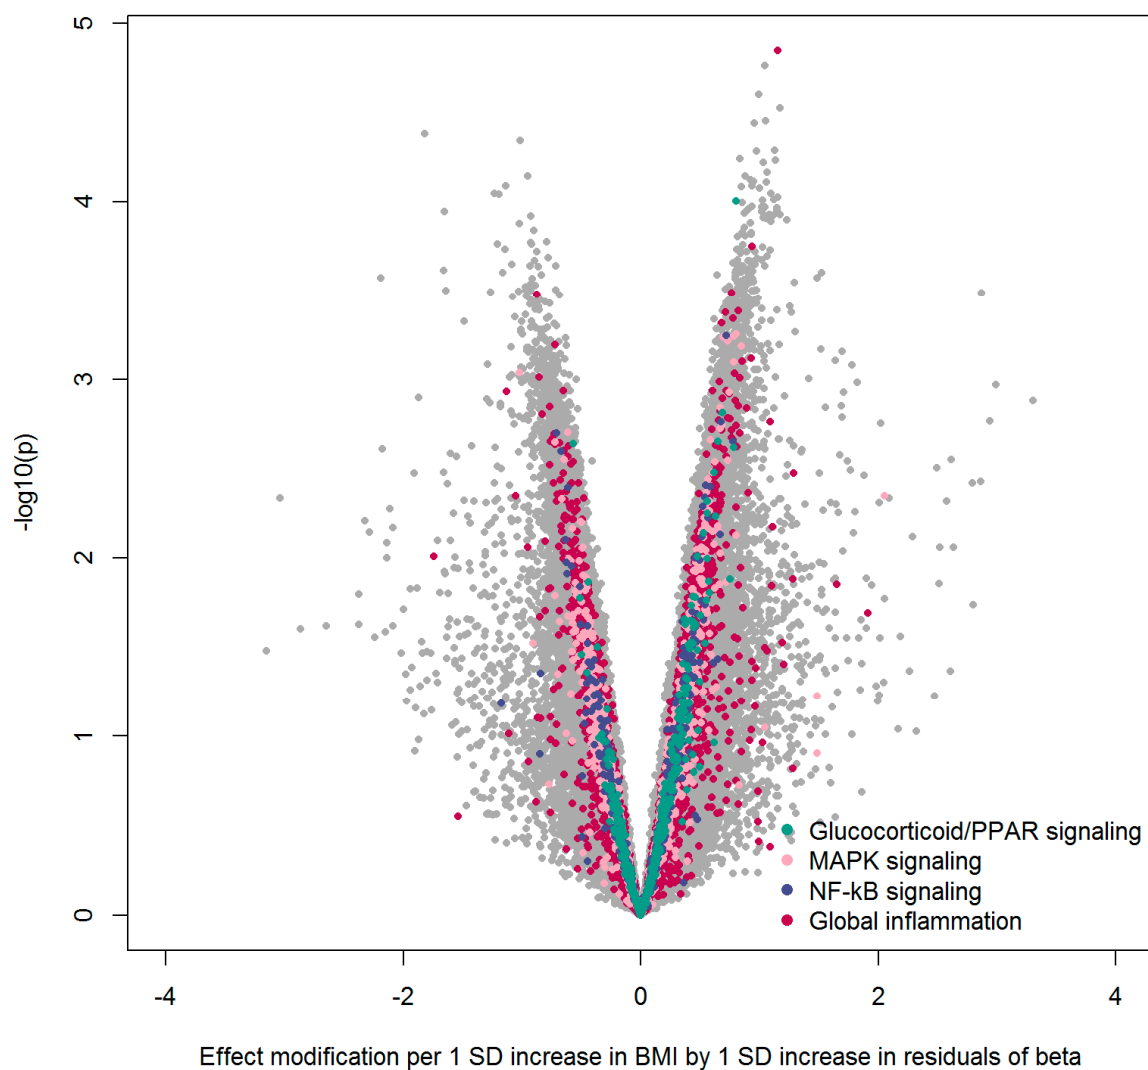

**Figure S1.** Volcano plot from the EWAS on effect modification by DNA methylation of the BMI-adult-onset asthma association, further adjusted for physical activity.



The EWAS fitted logistic regression models of adult-onset asthma on BMI, residuals of DNA methylation at a single CpG site, and their multiplicative interaction, upon adjustment for age, sex, education level, study area, pack-years of cigarettes smoked in life, physical activity, bench time, and white blood cell composition estimates for B cells, CD4 T cells, CD8 T cells, natural killer cells, monocytes, and eosinophils. The CpGs assigned to the pathway enriched with  $p < 0.05$  are highlighted in colors.

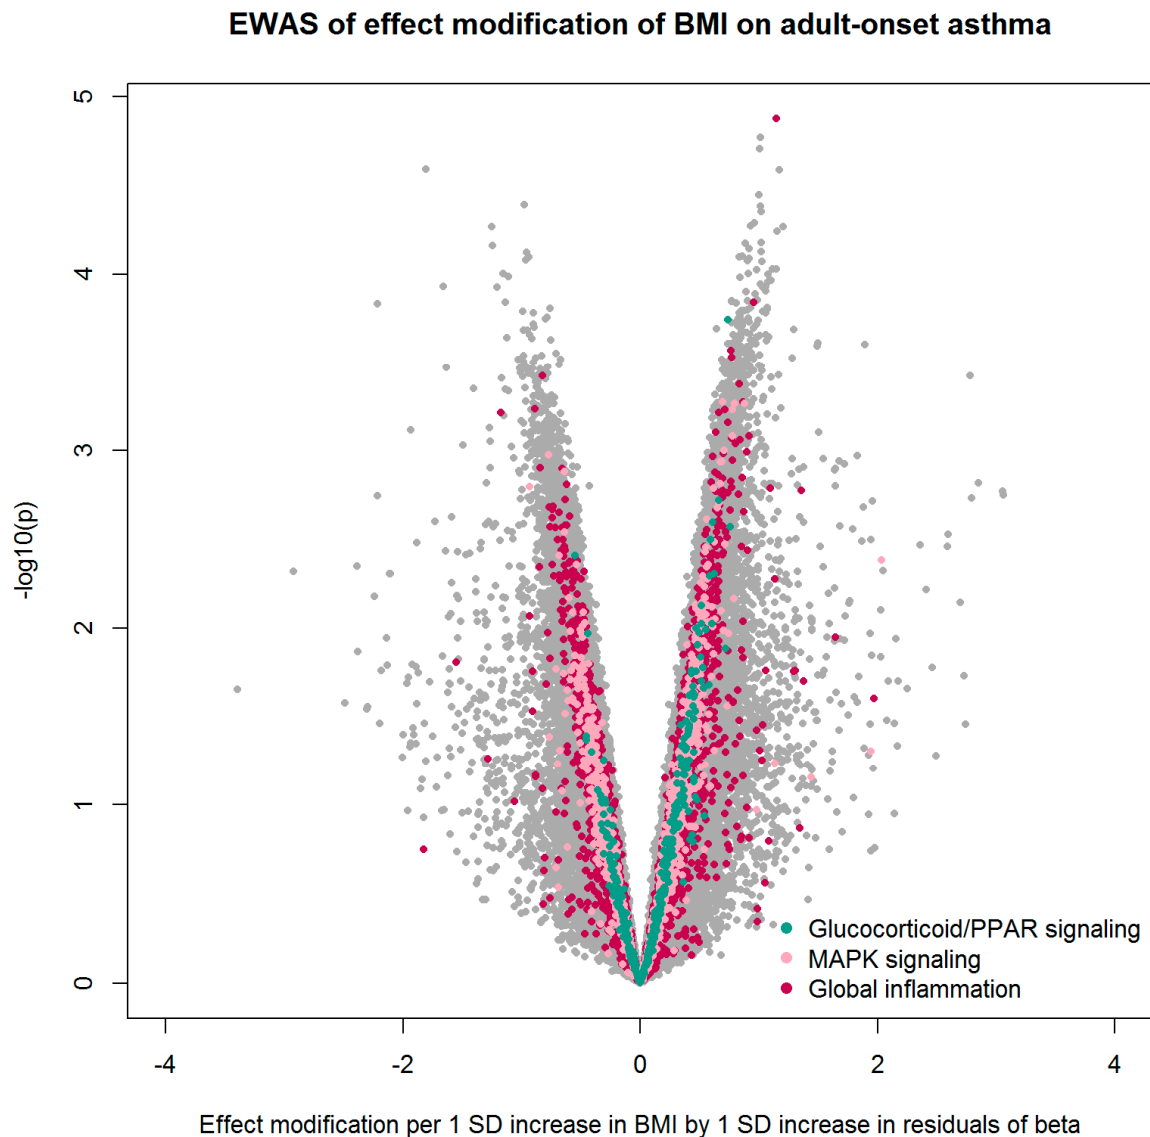

**Figure S2.** Volcano plot from the EWAS on effect modification by DNA methylation of the BMI- adult-onset asthma association, further adjusted for neutrophil estimates.

The EWAS fitted logistic regression models of adult-onset asthma on BMI, residuals of DNA methylation at a single CpG site, and their multiplicative interaction, upon adjustment for age, sex, education level, study area, pack-years of cigarettes smoked in life, bench time, and white blood cell composition estimates for B cells, CD4 T cells, CD8 T cells, natural killer cells, monocytes, eosinophils, and neutrophils. The CpGs assigned to the pathway enriched with  $p < 0.05$  are highlighted in colors.

### EWAS of effect modification of BMI change on adult-onset asthma

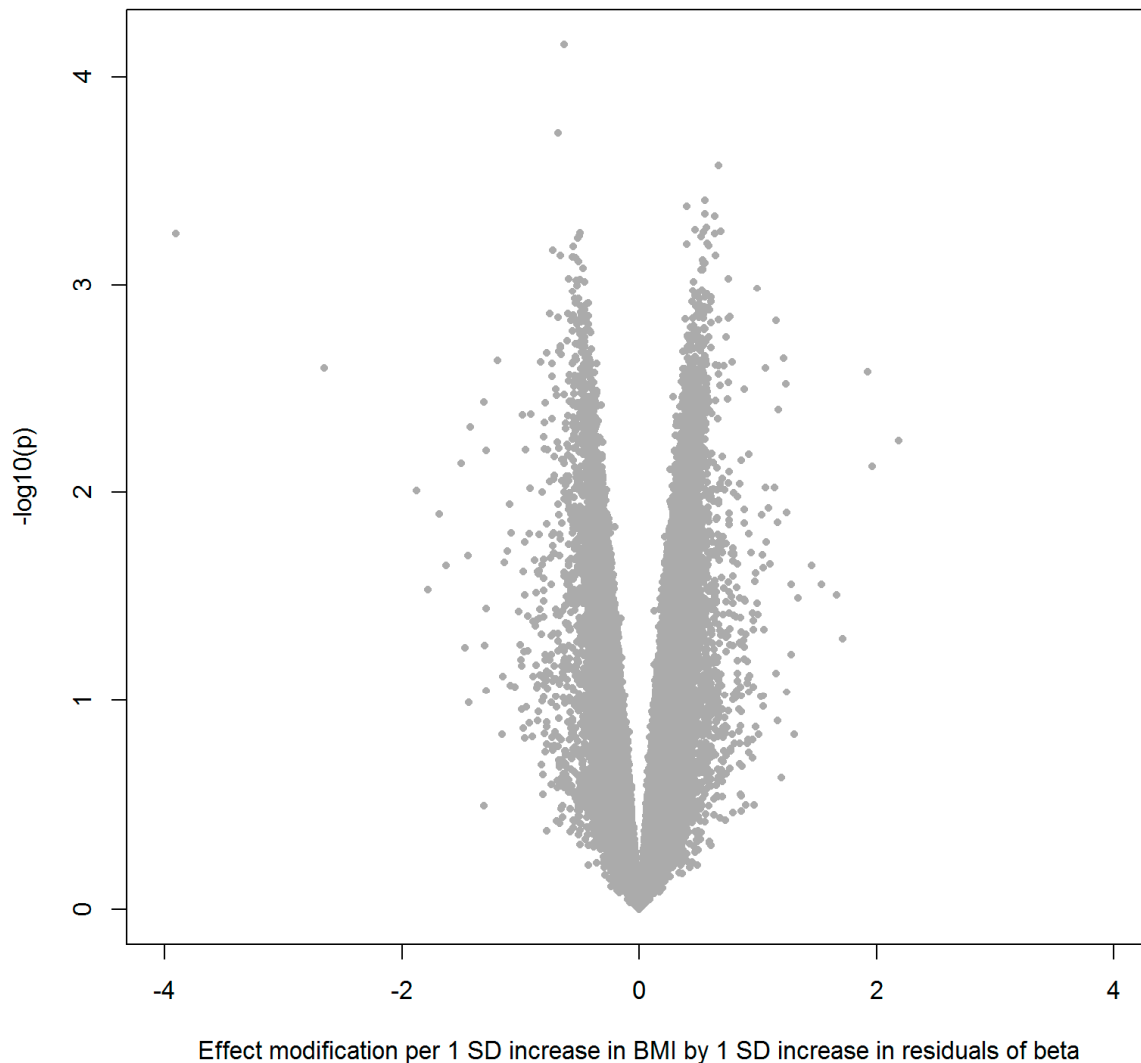

**Figure S3.** Volcano plot from the EWAS on effect modification by DNA methylation of the BMI change-adult-onset asthma association, further adjusted for physical activity.

The EWAS fitted logistic regression models of adult-onset asthma on BMI change, residuals of DNA methylation at a single CpG site, and their multiplicative interaction, upon adjustment for age, sex, education level, study area, pack-years of cigarettes smoked in life, physical activity, bench time, and white blood cell composition estimates for B cells, CD4 T cells, CD8 T cells, natural killer cells, monocytes, and eosinophils.

### EWAS of effect modification of BMI change on adult-onset asthma

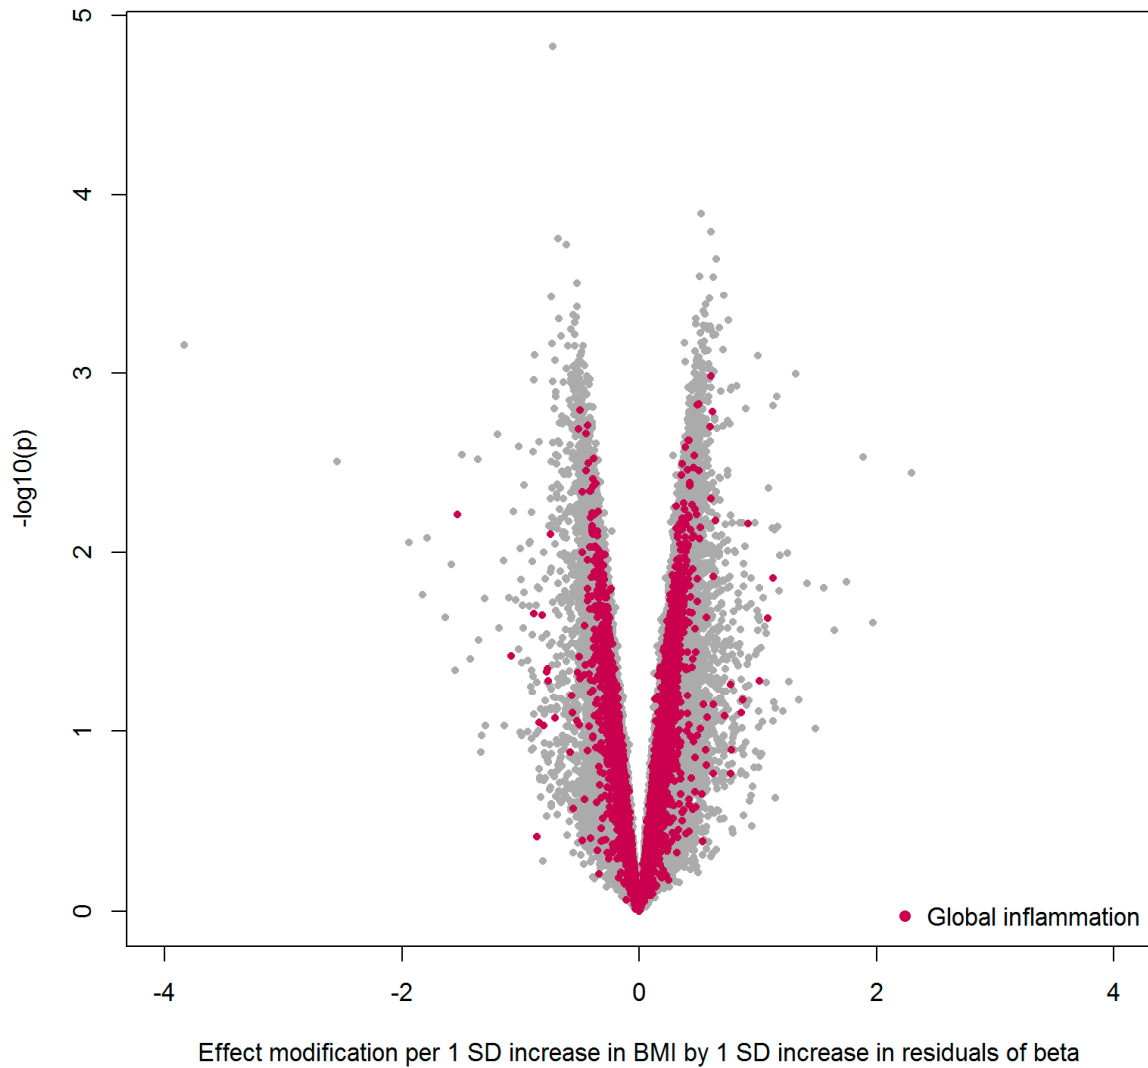

**Figure S4.** Volcano plot from the EWAS on effect modification by DNA methylation of the BMI change-adult-onset asthma association, further adjusted for neutrophil estimates.

The EWAS fitted logistic regression models of adult-onset asthma on BMI change, residuals of DNA methylation at a single CpG site, and their multiplicative interaction, upon adjustment for age, sex, education level, study area, pack-years of cigarettes smoked in life, bench time, and white blood cell composition estimates for B cells, CD4 T cells, CD8 T cells, natural killer cells, monocytes, eosinophils, and neutrophils. The CpGs assigned to the pathway enriched with  $p < 0.05$  are highlighted in colors.

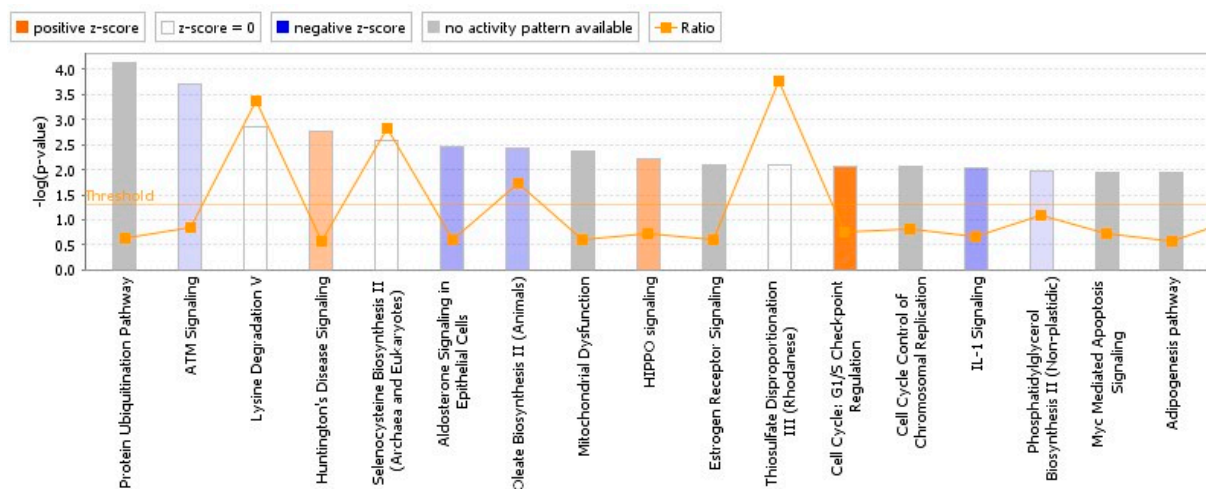

© 2000-2018 QIAGEN. All rights reserved.

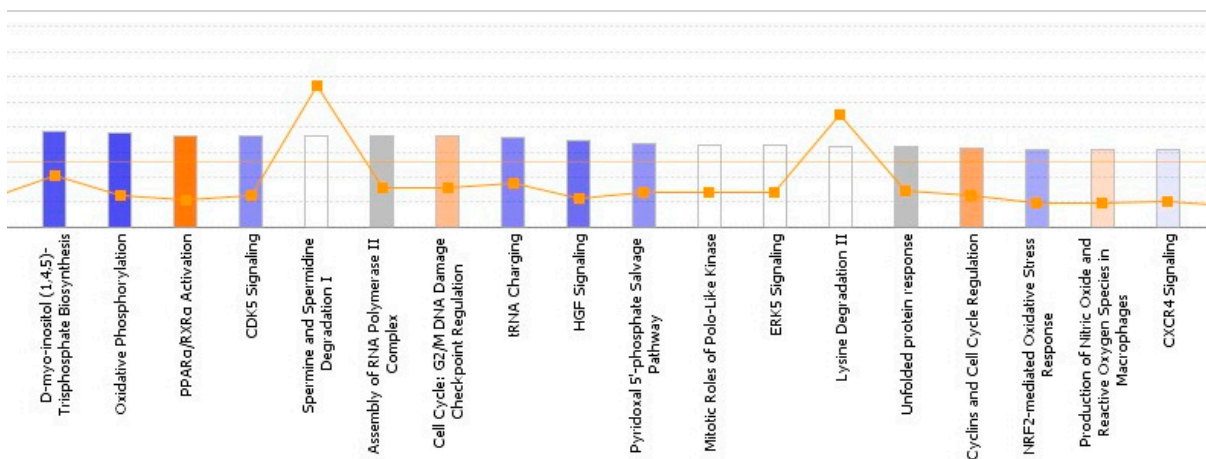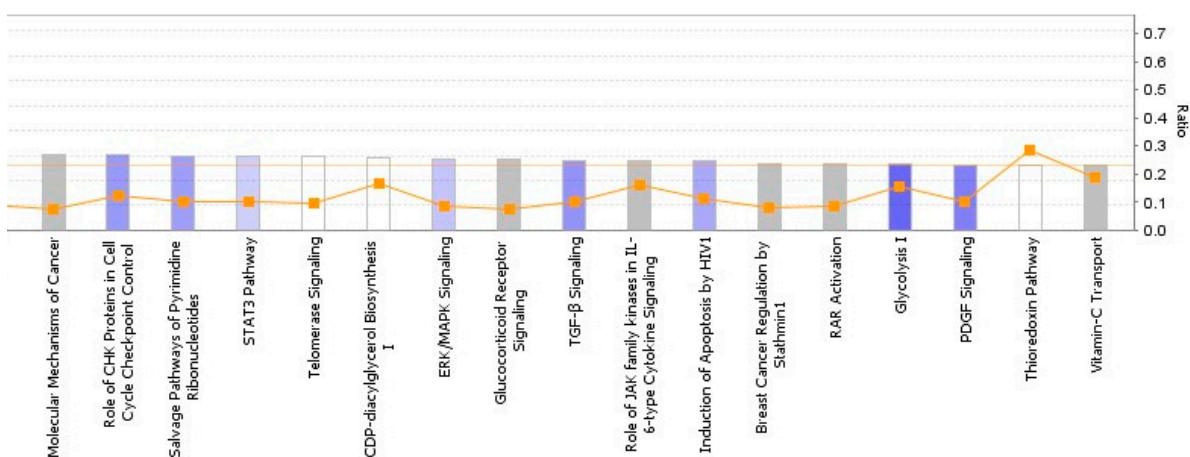

**Figure S5.** Agnostic pathway enrichment results of the DMRs identified from the EWAS on effect modification of the BMI-adult-onset asthma association.
